# Supplementary material for: Nitrogen electroreduction and hydrogen evolution on cubic molybdenum carbide: a density functional study
Source: Royal Society of Chemistry journal article supplement (doi:10.1039/c8cp01643g), 2018-01-01
Supplement: c8cp01643g1.pdf [file c8cp01643g1.pdf]

## Supplementary information

### Nitrogen Electroreduction and Hydrogen Evolution on Cubic Molybdenum Carbide: A Density Functional Study

Ivana Matanovic<sup>a,b</sup> and Fernando H. Garzon<sup>\*a,c</sup>

<sup>a</sup> Chemical and Biological Engineering Department, Center for Micro-Engineered Materials, University of New Mexico, Albuquerque, NM 87131, USA

<sup>b</sup> Theoretical Division, Los Alamos National Laboratory, Los Alamos, NM 87545, USA

<sup>c</sup> Sandia National Laboratory, Albuquerque, NM 87131, USA

\*garzon@unm.edu

**Table S1.** Change in the free energies for the  $* + 1/2N_2 \rightarrow *N$  and  $* + H^+ + e^- \rightarrow *H$  reactions (in eV) on different cubic MoC and MoC<sub>0.5</sub> surfaces. \* denotes a clean surface

| MoC                                         | [100] | [110]       | (111) | (111)* | (311)  |       |
|---------------------------------------------|-------|-------------|-------|--------|--------|-------|
| $\Delta_r G (* + H^+ + e^- \rightarrow *H)$ | 0.61  | -0.12       | -0.40 | -0.69  | -0.45  |       |
| $\Delta_r G (* + 1/2N_2 \rightarrow *N)$    | -0.49 | 0.17        | -1.20 | -0.90  | -0.38  |       |
| MoC <sub>0.5</sub>                          | (001) | (100)/(010) | (101) | (111)  | (111)* | (311) |
| $\Delta_r G (* + H^+ + e^- \rightarrow *H)$ | 0.48  | -0.35       | -0.39 | -0.65  | -0.59  | -0.78 |
| $\Delta_r G (* + 1/2N_2 \rightarrow *N)$    | 0.63  | -0.08       | -0.39 | -2.09  | -1.97  | -1.89 |

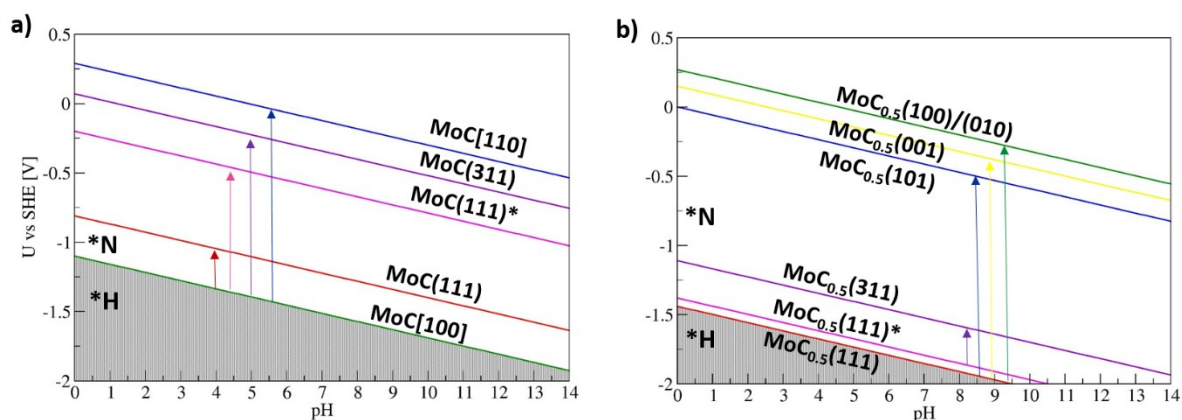

**Figure S1.** Pourbaix diagram of cubic a) MoC and b) MoC<sub>0.5</sub> that shows the conditions under which the surface will likely be covered with H-adatoms (grey) or N-adatoms (white). The Pourbaix diagrams were constructed using  $\Delta_r G (* + H^+ + e^- \rightarrow *H)$  and  $\Delta_r G (* + 1/2N_2 \rightarrow *N)$  values from Table S1. The full lines show the conditions under which  $\Delta_r G (* + H^+ + e^- \rightarrow *H) = \Delta_r G (* + 1/2N_2 \rightarrow *N)$ . Vertical arrows show how the stability region of H-adatoms changes with the change of the surface structure.
